# Supplementary material
Source: MDPI journal article supplement (https://www.mdpi.com/2076-3417/13/16/9484)
Supplement: s1 [file s1]

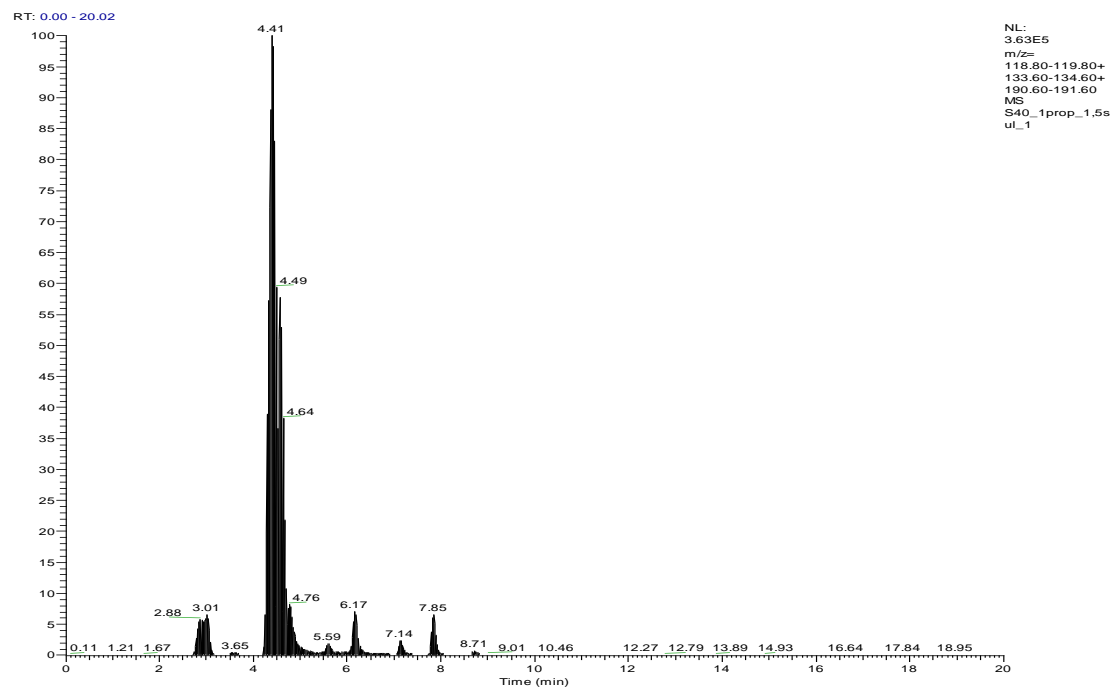

**Figure S1:** A representative total ion chromatogram of 1-propanol extract obtained under optimized conditions: RT 4.41 min, chlorogenic acid; RT 4.56 min, caffeic acid; RT 6.16 min, p-coumaric acid.
